1     ***Darwinian selection of host and bacteria supports emergence of Lamarckian-like***  
2                                   ***adaptation of the system as a whole***

3                                   Dino Osmanovic, David A Kessler, Yitzhak Rabin, Yoav Soen\*

6                                   **Author Affiliations:**

7     Osmanovic D: <sup>1</sup>Department of Physics, Bar-Ilan University, Ramat Gan 52900, Israel,  
8     [osmanovic.dino@gmail.com](mailto:osmanovic.dino@gmail.com), <sup>2</sup> MIT - Physics of Living Systems

9     Kessler DA: Department of Physics, Bar-Ilan University, Ramat Gan 52900, Israel,  
10    [kesslerda1@gmail.com](mailto:kesslerda1@gmail.com)

11    Rabin Y: <sup>1</sup> Department of Physics, Bar-Ilan University, Ramat Gan 52900, Israel,  
12    [rabinserious@gmail.com](mailto:rabinserious@gmail.com), <sup>2</sup> NYU-ECNU Institute of Physics at NYU Shanghai 200062,  
13    China

14    Soen Y: Department of Biological Chemistry, Weizmann Institute of Science, Rehovot  
15    76100, Israel, [yoavs@weizmann.ac.il](mailto:yoavs@weizmann.ac.il), <sup>2</sup> MIT - Physics of Living Systems

16

17    \* Corresponding author: Yoav Soen, [yoavs@weizmann.ac.il](mailto:yoavs@weizmann.ac.il)

18

19

20

21

22

23

24

25

26

## Abstract

27 **Background:** The relatively fast selection of symbiotic bacteria within hosts and the potential  
28 transmission of these bacteria across generations of hosts raise the question of whether interactions  
29 between host and bacteria support emergent adaptive capabilities beyond those of germ-free hosts.

30 **Results:** To investigate possibilities for emergent adaptations that may distinguish composite host-  
31 microbiome systems from germ-free hosts, we introduce a population genetics model of a host-  
32 microbiome system with vertical transmission of bacteria. The host and its bacteria are jointly exposed  
33 to a toxic agent, creating a toxic stress that can be alleviated by selection of resistant individuals and by  
34 secretion of a detoxification agent (“detox”). We show that toxic exposure in one generation of hosts  
35 leads to selection of resistant bacteria, which in turn, increases the toxic tolerance of the host’s  
36 offspring. Prolonged exposure to toxin over many host generations promotes additional form of  
37 emergent adaptation due to selection of hosts based on detox capabilities of their bacterial community  
38 as a whole (as opposed to properties of individual bacteria).

39 **Conclusions:** These findings show that interactions between pure Darwinian selections of host and its  
40 bacteria can give rise to emergent adaptive capabilities, including Lamarckian-like adaptation of the  
41 host-microbiome system.

42

43 **Keywords:** Host-microbiome interactions – Holobiont – Darwinian Selection – Emergent adaptation –  
44 Lamarckian Adaptation – Vertical and Horizontal transmission – Population Genetics

45

46

47

48

49

## 50 **Background**

51 Evolutionary adaptations are commonly thought to be driven by genetic mutations occurring on a  
52 timescale of many generations. Selection of individuals with rare beneficial mutations and  
53 transmission of the mutations across generations can then support adaptive evolution of the  
54 population. The exclusive focus on mutations that rarely occur during the lifetime of an individual has  
55 recently been expanded [1-7] to mechanisms supporting various forms of non-Mendelian inheritance,  
56 including: transgenerational epigenetic phenomena [8-11], genome editing and mobility systems [12,  
57 13], niche construction [14] and transmission of symbiotic microorganisms [3, 5, 6, 15-19]. The case of  
58 symbiotic organisms may be of particular interest because of its broad relevance to animals and plants  
59 and the potential of host-microbe interactions to support adaptations that were traditionally  
60 considered impossible for hosts and bacteria on their own [3, 5, 17, 20, 21]. This is primarily due to a  
61 fundamental distinction between a composite, host-microbiome system and germ-free hosts, namely  
62 that the former undergoes intertwined selections, operating on different timescales: rapid selections  
63 of symbiotic microorganisms within the host and slower selection of that host (with its bacterial  
64 population). While the selection of each bacterium is governed by its individual traits, selection of the  
65 host depends jointly on the traits of the host and the properties of its bacterial community [20, 22-27].  
66 This community can vary during the lifetime of the host and resident bacteria can be transferred  
67 across generations and/or between neighboring hosts [28-34]. Whether symbiosis between a host  
68 and microorganisms (collectively referred to as a holobiont [17] [35]) warrants a significant change to  
69 evolutionary thinking is currently under debate [36-39]. In particular, it is not clear whether the  
70 association between host and bacteria is tight enough to consider the holobiont as a unit of selection  
71 in evolution [36, 37] and whether transmission of bacteria across generations of hosts is stable enough  
72 to support non-traditional adaptive capabilities. To investigate the feasibility of emergent adaptations,

73 we introduce a modeling framework that avoids speculative assumptions and relies instead on  
74 interactions between well-accepted Darwinian selection of host and resident bacteria. This allows us  
75 to study how particular types of interactions influence the adaptation of host and bacteria on a wide  
76 range of timescales. Our modelling approach builds on the traditional framework of population  
77 genetics [40, 41], but extends it in order to account for important considerations of host-microbiome  
78 systems that are not relevant for a population of germ-free hosts. In this model, we evaluate the  
79 adaptation of host and vertically-transmitted bacteria that are jointly exposed to a toxic agent. The  
80 exposure promotes Darwinian selections that occur on different timescales for host and bacteria. We  
81 find that the combined effect of these selections has profound implications. Among these, we show  
82 that the interaction between the selections of host and bacteria can give rise to an emergent,  
83 Lamarckian-like adaptation of the host-microbiome system within a single host generation. This effect  
84 is mediated by distinct modes of stress alleviation during a single host generation and it has a non-  
85 trivial dependence on the environmental conditions and on the characteristics of the system.  
86 Persistence of the exposure over timescales longer than a host generation promotes additional  
87 selection of hosts with bacterial communities that secrete higher average detox per bacterium (in  
88 contrast to selection of better fit individual bacteria, which takes place on much shorter timescales).  
89 This gives rise to a second mode of emergent adaptation that is independent of the Lamarckian-like  
90 adaptation within a single generation. In both cases, however, most of the adaptive benefit to the  
91 host is not attributable to changes in its own traits, but rather to alterations in the bacterial  
92 community. These alterations promote an increase in toxin tolerance which persists over periods  
93 longer than a host generation but shorter than typical evolutionary timescales.

94

95

## 96 **Results**

### 97 **General considerations of the model**

98 We consider the simplest case of a host-microbiome system in which every host is associated with a  
99 single species of symbiotic bacteria that is transmitted to the offspring with perfect fidelity. We take  
100 the generation time of a host to be much larger than for bacteria and we probabilistically determine  
101 the survival of each host and bacteria, according to the state of the organism at the end of their  
102 respective generation time (as detailed below). Each surviving host and bacterium gives rise to one  
103 offspring that inherits the traits of its parent, subject to a small random modification depending on a  
104 constant mutation rate,  $\mu$  (no epigenetics is considered). The host and its bacterial community are  
105 jointly exposed to a toxin of concentration  $T$ , thus creating a stress that impacts their survival  
106 probability of the host and each of its bacteria. This stress depends both on their intrinsic traits and on  
107 how they interact with one another. To investigate whether and how the coupling between the  
108 survival of host and bacteria could support non-traditional modes of adaptation, we consider broadly  
109 applicable types of interactions between host and bacteria. The mathematical representations of  
110 these interactions was chosen to simplify the identification and analysis of general effects which apply  
111 to many host-microbiome systems (as opposed to a model designed to fit a specific system).

112 We start by defining the toxic stress experienced by individual host and bacterium. Since this stress  
113 depends on the level of toxin,  $T$ , and on the individual's sensitivity to the toxin,  $x$ , we define the  
114 instantaneous toxic stress for host and bacteria as  $S_H = x_H T$  and  $S_B = x_B T$ , respectively. Accordingly, this  
115 stress can be alleviated by cell-intrinsic reduction in sensitivity and/or by secretion of a detoxifying  
116 agent, "detox" that reduces the toxic challenge (with or without associated cost).

117 Unlike in a germ-free system of hosts, a host in a composite host-microbiome system is influenced  
118 (and/or is dependent) on bacterial-derived nutrients and various other factors [42-44]. Exposure to

119 toxin may therefore lead to physiological stress to the host due to a significant loss of bacteria. An  
120 indirect stress to the host can also be induced by factors that promote a significant excess of bacteria.  
121 We model these effects by introducing a physiological stress,  $S_{ph}$ , which depends on deviations from a  
122 preferred size of the bacterial population. From the bacterial perspective, on the other hand, the host  
123 provides a niche (carrying capacity for bacteria). In the simpler case of free-living bacteria, the carrying  
124 capacity is typically modelled by a constant parameter, representing the extractable resources from an  
125 unchanging environment. The fixed niche assumption does not necessarily hold when the bacteria are  
126 accommodated inside a host which can modulate the size of the niche under stress [22]. Since we do  
127 not know in advance whether and how a host's stress influences the number of bacteria that can be  
128 accommodated, we constructed a population model in which this influence is determined by natural  
129 selection.

130 Altogether, the model considers host-microbiome interactions that are mediated by: (i) mutual  
131 alleviation of toxic challenge via secretion of a detoxification agent ("detox"), (ii) dependence of the  
132 hosts' well-being on the size of the bacterial population and (iii) modulation of the bacterial niche size  
133 by the stress state of the host.

#### 134 **Model formulation**

135 For each host and bacterium, we assign a probability of survival to reproduction,  $P_H$  and  $P_B$   
136 respectively, defined as follows:

$$137 \quad (1) \quad P_H = (1 - N_H/2K_H) \exp[-(\hat{S}_H + \hat{S}_{Ph})]$$

$$138 \quad (2) \quad P_B = (1 - N_B/2K_B) \exp(-S_B)$$

139 Here,  $N_H$  and  $N_B$  are the population sizes of hosts and bacteria per host, respectively,  $K_H$  is the maximal  
140 number of hosts that can be supported by the external environment (carrying capacity for hosts) and  
141  $K_B$  is the number of bacteria that can be accommodated in the host (carrying capacity for bacteria).

142 The toxic and physiological stress to the host,  $\hat{S}_H = \langle S_H \rangle_t$  and  $\hat{S}_{ph} = \ln(\langle N_B \rangle_t / K_B^0) + (1 - \langle N_B \rangle_t / K_B^0)$ ,  
143 are defined respectively in terms of time averages of  $S_H$  and  $N_B$  over a host generation time (interval  
144 between host reproduction events; recall that the probability of survival is calculated only at the end  
145 of each generation). The physiological stress vanishes when the time-averaged bacterial population,  
146  $\langle N_B \rangle_t$ , reaches a preferred size determined by a fixed parameter,  $K_B^0$ . The latter also sets an inverse  
147 scale ( $1/K_B^0$ ) for the negative impact of losing too many bacteria or having to support excess numbers  
148 of bacteria [43].

149 To test if selection might favor hosts that react to toxic stress by modulating the niche available for  
150 bacteria [45-48], we consider a population of hosts, each with a distinct dependence of the carrying  
151 capacity on the toxic stress of the host. For that, we define  $K_B$  as:

$$152 \quad (3) \quad K_B = K_B^0 (1 + \delta \cdot S_H)$$

153 where  $\delta$  is an evolvable trait, determining how the bacterial niche in the host is affected by the toxic  
154 stress it experiences. Since bacteria can affect this stress by secreting detox on a timescale shorter  
155 than a host generation,  $K_B$  is jointly influenced by the host and the bacteria. To enable unbiased  
156 analysis of how  $K_B$  changes in response to selection under exposure to toxin, we considered a starting  
157 population of hosts with a broad distribution of  $\delta$ 's, symmetric around zero.

158 We assume that all the hosts and their bacteria are exposed, at time  $t$ , to the same influx of active  
159 toxin,  $\vartheta(t)$ , applied instantaneously (i.e., in one bacterial generation,  $\Delta t$ ). This toxin can be neutralized  
160 by release of detox from the host and each of its bacteria [43, 48-50]:

$$161 \quad (4) \quad T(t+\Delta t) = T(t) \exp(-\lambda_B \sum y_B - \lambda_H y_H) + \vartheta(t)$$

162 where  $y_H$  and  $y_B$  are the instantaneous amounts of detox secreted inside the host (by resident bacteria  
163 and the host itself) and  $\lambda_H$  and  $\lambda_B$  are the respective detoxification capacities of host and bacteria. We

164 assume that all the bacteria of a given host benefit equally from the total amount of detox, regardless  
165 of their individual contributions to this total amount. The effect of having a cost associated with the  
166 secretion of detox by the bacteria is investigated in an extended version of the model (Supplementary  
167 Information).

168 The evolvable traits of the model ( $\mathbf{x}$ ,  $\mathbf{y}$  and  $\delta$ ) are initially drawn from trait-specific distributions and  
169 are modified by the joint actions of mutation and selection. Surviving bacteria divide at every time  
170 step of the simulation ( $\Delta t$ ), while the surviving hosts reproduce every  $\tau$  generations of bacteria (so that  
171 the host generation time is  $\tau \Delta t$ ). We consider the simplest reproduction model in which each of the  
172 surviving hosts and bacteria gives rise to one offspring that inherits the traits of its parent, subject to a  
173 small random modification depending on a constant mutation rate,  $\mu$ :

174 (5) 
$$\mathbf{z}_{\text{offspring}} = \mathbf{z}_{\text{parent}} + \eta \sqrt{\mu} - \beta_z \mu (\mathbf{z}_{\text{parent}} - \mathbf{z}_0)$$

175 Here  $\mathbf{z}$  corresponds to any of the evolving traits  $\mathbf{x}$ ,  $\mathbf{y}$  and  $\delta$ ,  $\eta$  is a standard Gaussian deviate with zero  
176 mean, and the parameters,  $\mathbf{z}_0$  and  $\beta_z$  are trait-specific coefficients controlling the peak and width of the  
177 steady state distributions (specified in Methods). Note that  $1/\beta_z$  sets a characteristic time for the  
178 distribution of a trait  $\mathbf{z}$  to return to steady state, following an initial perturbation. The values of  $\beta_y$  and  
179  $\beta_\delta$  were chosen to support broad distributions of  $\mathbf{y}$  and  $\delta$ , respectively. To prevent a trivial solution in  
180 which all the individuals are completely insensitive to toxin, the sensitivity distribution (i.e. for  $\mathbf{z} = \mathbf{x}_H$   
181 and  $\mathbf{x}_B$ ) is truncated at  $\mathbf{x} = 0$ . We also avoid negative values of detox secretion by setting negative  $\mathbf{y}$   
182 values in Eq. 5 to zero. The remaining dynamic variables are updated in every generation of bacteria  
183 ( $\mathbf{N}_B$ ,  $\mathbf{T}$ ,  $\mathbf{S}_H$ ,  $\mathbf{S}_B$  and  $\mathbf{K}_B$ ) and host ( $\mathbf{N}_H$ ). This study was based on an initial population of 32000 hosts ( $\mathbf{N}_H =$   
184  $\mathbf{K}_H = 32000$ ) with 100 bacteria per host ( $\mathbf{N}_B = \mathbf{K}_B^0 = 100$ ). The host generation time was set to  $\tau = 100$   
185 bacterial generations and all the mutation rates were  $\mu = 10^{-3}$  per generation (for both host and  
186 bacteria).



187 **Stress-dependent adjustment of bacterial niche size**

188 We examined the effects of exposure to a single pulse of toxin,  $T_0$ , applied at  $t_0$  (i.e.  $\mathcal{D}(t_0)=T_0$ ). On  
189 timescales smaller than one host generation ( $100\Delta t$ ), the bacterial community undergoes selection for  
190 less sensitive bacteria, accompanied by a drop in the bacterial population size (Figs. 1A,B). In a system  
191 with only one level of selection (e.g. free-living bacteria), this would be the only adaptive change.  
192 However, when the bacterial population is symbiotically coupled to a host, the survival of each host and  
193 bacterium depends also on the amount of detox secreted by the bacteria (Fig. 1C). The secretion is  
194 higher for hosts which react to the toxic stress by increasing their carrying capacity for bacteria (i.e.  
195 hosts with  $\delta > 0$ ; Supplementary Fig. S1A). This leads to stress-dependent selection of hosts which  
196 provide a larger bacterial niche  $K_B$  (Fig. 1D), thus increasing the number of resistant bacteria beyond  $K_B^0$   
197 (Fig. 1A). The benefit from this increase is two-fold: It alleviates the negative impact of losing bacteria  
198 (by assisting recovery of the bacterial population; Fig. 1E, Supplementary Fig. S1B) and increases the  
199 total amount of secreted detox (Fig. 1F, Supplementary Fig. S1C). However, when  $\langle N_B \rangle_t$  is larger than  
200  $K_B^0$ , the benefit from higher detox secretion is accompanied by the negative impact of bacterial  
201 overload. The combination of the opposing effects of increasing the bacterial niche size adjusts the size  
202 of the bacterial population in a stress-dependent manner which acts to maximize the probability of  
203 survival of the host.

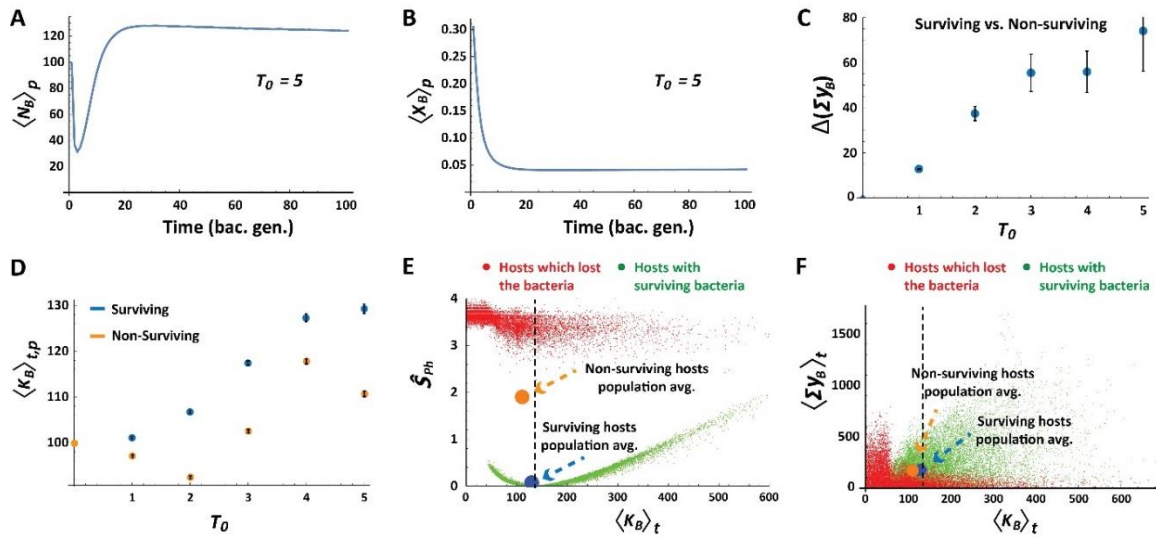

204

205 **Figure 1: Stress-dependent adjustment of the average bacterial niche size.** (A,B) Short term kinetics of  
 206 the population-averaged number of bacteria,  $\langle N_B \rangle_p$  (A) and bacterial sensitivity,  $\langle X_B \rangle_p$  (B) for hosts which  
 207 survived a single pulse of exposure to toxin,  $T_0=5$ , applied at the initial time step. (C) Average difference  $\pm$   
 208 standard error (SE) between surviving and non-surviving hosts with respect to the total amount of detox  
 209 secreted by bacteria over a host generation (shown for each  $T_0$ ). (D) Mean carrying capacity for bacteria in  
 210 the population of hosts, averaged ( $\pm$  SE) over a host generation at different levels of  $T_0$ . (E) Average  
 211 physiological stress over a host generation,  $\hat{S}_{Ph}$ , versus the time average of its carrying capacity for bacteria.  
 212 Green and red points represent hosts with surviving and non-surviving bacteria, respectively. Blue and  
 213 orange circles mark population averages for surviving and non-surviving hosts, respectively. Dotted line  
 214 marks carrying capacity which minimizes the physiological stress. (F) Same as (E) for the time average of  
 215 total bacterial detox versus bacterial carrying capacity. Time and population averages are denoted by  $t$  and  
 216  $p$  subscripts, respectively).

217

## 218 Stress-dependent adaptation within a host generation

219 Microbiomes that are modified by the stress in one host generation can be transmitted to the host's  
 220 offspring and potentially increase its stress tolerance. In order to evaluate the possibility and magnitude  
 221 of this outcome we introduce a new measure, termed the "*Lamarckian*". It quantifies the increase in  
 222 the survival probability of the host offspring due to (stress-dependent) changes in the microbiome,  
 223 which occurred during the lifetime of the parental host. To take into account only those changes that  
 224 were induced by the environmental stress, we compared the survival of offspring hosts to the survival

225 of their parents, judged by exposure at their initial state. To implement this analysis in the simulation,  
226 we identify the hosts which survived a generation of exposure, revert them to the initial state of their  
227 microbiome and apply a new simulation to the reverted hosts (denoted “cloned parents”) and their  
228 offspring (Fig. 2A). We then compare the survival rates of the offspring ( $SR_{Offs}$ ) to that of their cloned  
229 parents ( $SR_{CP}$ ) and define the *Lamarckian*,  $L$ , as:

$$230 \quad (6) \quad L = SR_{Offs} / SR_{CP} - 1,$$

231 so that it is positive if the average survival increases due to transfer of changes acquired during a host  
232 generation. The use of the initial state of the parental host and its microbiome allows us to distinguish  
233 the increase of tolerance due to selection of initially better fit parents, from the gain of tolerance due  
234 to transmission of changes acquired during a host generation (not present in the initial parental clones).

235 For a given  $\lambda_B$ , we find that  $L$  is an increasing function of the injected amount of toxin, vanishing only at  
236 low  $T_0$  (Fig. 2B). For a given  $T_0$ , the *Lamarckian* has a non-monotonic dependence on  $\lambda_B$ . This is  
237 manifested by an essentially constant  $L > 0$  over a range of small  $\lambda_B$ , followed by an increase to a  
238 maximum at intermediate values of  $\lambda_B$  and lastly, a decline at sufficiently large  $\lambda_B$  (Fig. 2C). The positive  
239 *Lamarckian* is the result of transgenerational transfer of bacterial population that has been selected for  
240 lower toxin sensitivity during the parental host generation (Fig. 2D). To determine how these bacteria  
241 increase the probability of survival of the hosts’ offspring, we analyzed the toxic and physiologic stress  
242 in the offspring vs. their cloned parents. For small enough  $\lambda_B$ , the benefit from bacterial secretion of  
243 detox is negligible and the positive *Lamarckian* is primarily due to alleviation of the physiological stress  
244 in the offspring (Supplementary Fig. S2A). This is due to inheritance of bacteria that are less sensitive to  
245 toxin (Fig. 2D), so that the population size of bacteria in the exposed offspring remains closer to the  
246 preferred value ( $K_B^0$ ) compared to the bacterial population in their cloned parents. At intermediate  
247 values of  $\lambda_B$ , the offspring have an additional benefit due to the detox secreted by their toxin-resistant  
248 bacteria, thus making a second contribution to the *Lamarckian* (Fig. 2E,F). However, when  $\lambda_B$  is large

249 enough to support substantial neutralization of toxin during a single host generation (Supplementary  
 250 Fig. S3), the selection pressure on both hosts and their microbiomes is weakened and the *Lamarckian*  
 251 decreases because of the diminished difference between parents and offspring (Fig S2B).

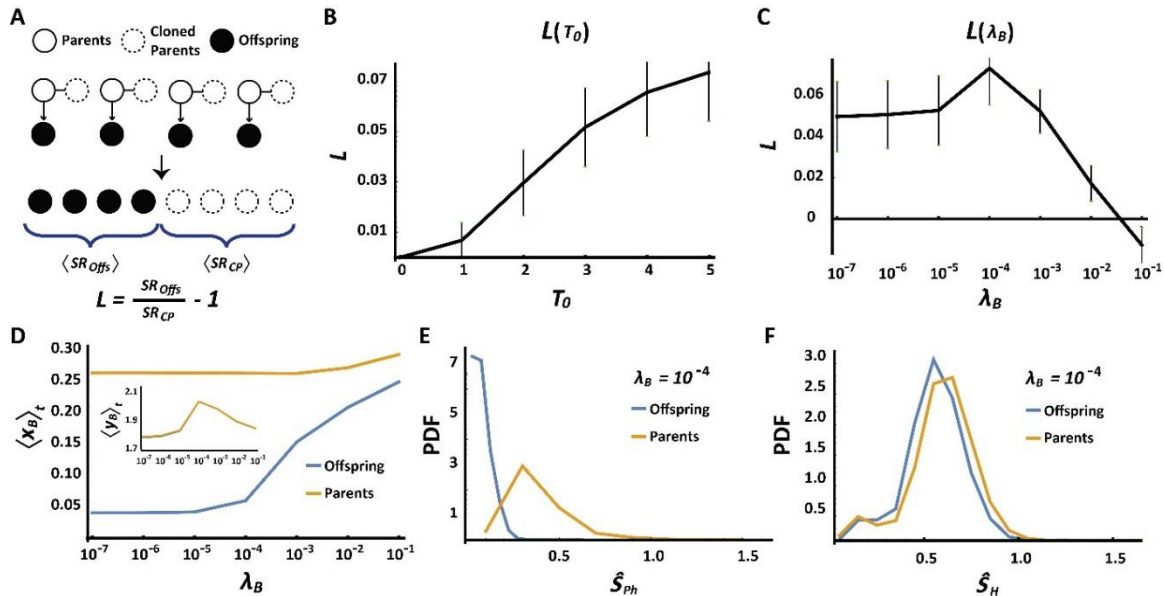

252  
 253 **Figure 2: Stress-dependent adaptation within one host generation.** (A) Schematics of the Lamarckian  
 254 evaluation protocol. (B, C) The *Lamarckian* as a function of toxic exposure (B) and bacterial detox coefficient  
 255 (C). (D) Bacterial sensitivity and detox per bacteria (inset) as a function of bacterial detox coefficient, after  
 256 exposure to toxin ( $T_0=5$ ). Shown are time (and population) averages over one generation of unexposed  
 257 ‘clones’ of surviving parents (orange) and their offspring (blue). (E,F) Distributions of physiological ( $\hat{S}_{ph}$ ) and  
 258 toxic stress ( $\hat{S}_H$ ) experienced by cloned parents and their offspring, following exposure to a toxin pulse ( $T_0$   
 259 =5) applied at the initial time step. Shown for the case of  $\lambda_B = 10^{-4}$ .

260

### 261 Selection of hosts based on traits of their bacterial community (‘Microbiome Selection’)

262 When the toxic pressure persists over timescales larger than one host generation (Fig. 3A), the  
 263 selection favors hosts with bacterial communities that secrete higher amounts of detox per bacterium,  
 264  $\langle y_B \rangle_P$  (Fig. 3B). Since this selection is determined primarily by the microbiome as a whole and not by  
 265 individual bacteria, we will refer to it as *Microbiome selection*. When the secretion of detox comes at  
 266 a cost to the individual, the microbiome selection for detox is weakened, but it is still apparent over a

267 broad range of cost levels (Supplementary Fig. S4A,B). The negative effect of the cost on the survival  
 268 probability of bacteria (Supplementary Information, Eq. 2') aggravates the initial loss of bacteria and  
 269 increases the physiological stress to the host (Supplementary Fig. S4C). This promotes selection of  
 270 hosts that can partially alleviate this stress by accommodating larger numbers of bacteria  
 271 (Supplementary Fig. S4D). The cost on bacterial detox therefore strengthens the selection of hosts  
 272 which accommodate more bacteria at the expense of weakening the selection for increased detox per  
 273 bacterium. The Lamarckian effect, on the other hand, is not compromised by the cost of detox  
 274 (Supplementary Fig. S5A,B), because the increase of physiological stress in parent hosts is larger than  
 275 the corresponding increase in their offspring (Supplementary Fig. S5C).

276 In the current model, the microbiome selection occurs only at the time of host reproduction. If the  
 277 toxin persists over a period longer than  $\mu^{-1}$  bacterial generations and the elimination of mutations is  
 278 sufficiently slow (i.e. small  $\beta_y$ ), the selection is accompanied by significant accumulation of bacterial  
 279 mutations. Such accumulation enhances the selection for higher  $\langle y_B \rangle$ , thus increasing the  
 280 detoxification rate (Fig. 3A, inset) and expediting host adaptation (Fig. 3C). This is accompanied by  
 281 extended persistence of high detox levels (Fig. 3B) and by elevated detox variability across host-  
 282 microbiome systems (Fig. 3B, inset). Additional increase of variability under stress is observed in the  
 283 carrying capacity for bacteria and in the size of the bacterial population (Figs. S6A,B).

284

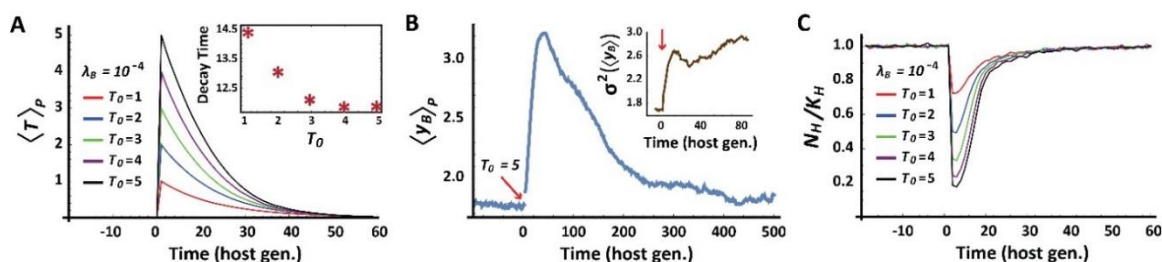

285

286 **Figure 3: Stress-dependent selection of hosts based on microbiome properties.** (A) Temporal kinetics of  
 287 active toxin for different initial levels of toxin,  $T_0$ . Inset displays the time to neutralize 50% of the toxin. (B)  
 288 Temporal kinetics of average detox secretion per bacteria following exposure to toxin at  $T_0=5$  (red arrow).

289  $\lambda_B = 10^{-4}$ . Inset reveals an increase of inter-hosts variance in average detox per bacteria. **(C)** Kinetics of host  
290 population size,  $N_H$ , normalized by the host carrying capacity,  $K_H$ .  
291  
292  
293 Following the neutralization of toxin, the selected bacterial mutations persist over a characteristic  
294 timescale of  $1/\mu = 10$  host generations, thus providing a ‘memory’ of the previous exposure. To evaluate  
295 the influence of this ‘memory’ on the tolerance to new exposures, we analyzed the response to  
296 repeated pulses of injected toxin, separated by time intervals shorter than 10 host generations. The re-  
297 exposures led to microbiome selections occurring at a rate that is sufficient to oppose the relaxation of  
298  $\langle y_B \rangle_P$  to its (lower) equilibrium value (Fig. 4A vs. Fig. 3B). The resulting enhancement of detoxification  
299 (Fig. 4B), reduced the selection pressure on the host (Fig. 4C) and enabled the survival of intrinsically  
300 less resistant hosts and bacteria (Fig. 4D). Progressive reduction in the intrinsic resistance of the host  
301 due to successive selections of higher bacterial detox, is reminiscent of *Genetic Assimilation* by  
302 successive selections of host-intrinsic alleles [51, 52]. In the case of microbiome selection, however, the  
303 gradual change in the population of hosts is caused by successive selection of variations in the bacterial  
304 population (“Bacterial/*Microbiome Assimilation*”). Bacterial variations emerge on faster timescales  
305 compared with germline mutations in the host genome, but they are considerably less stable than host-  
306 intrinsic mutations. However, when the repertoire of host-intrinsic alleles available for selection is  
307 limited, the hosts’ population may become more strongly dependent on variations that emerge within  
308 the host’s lifetime (e.g. bacterial and epigenetic variations).

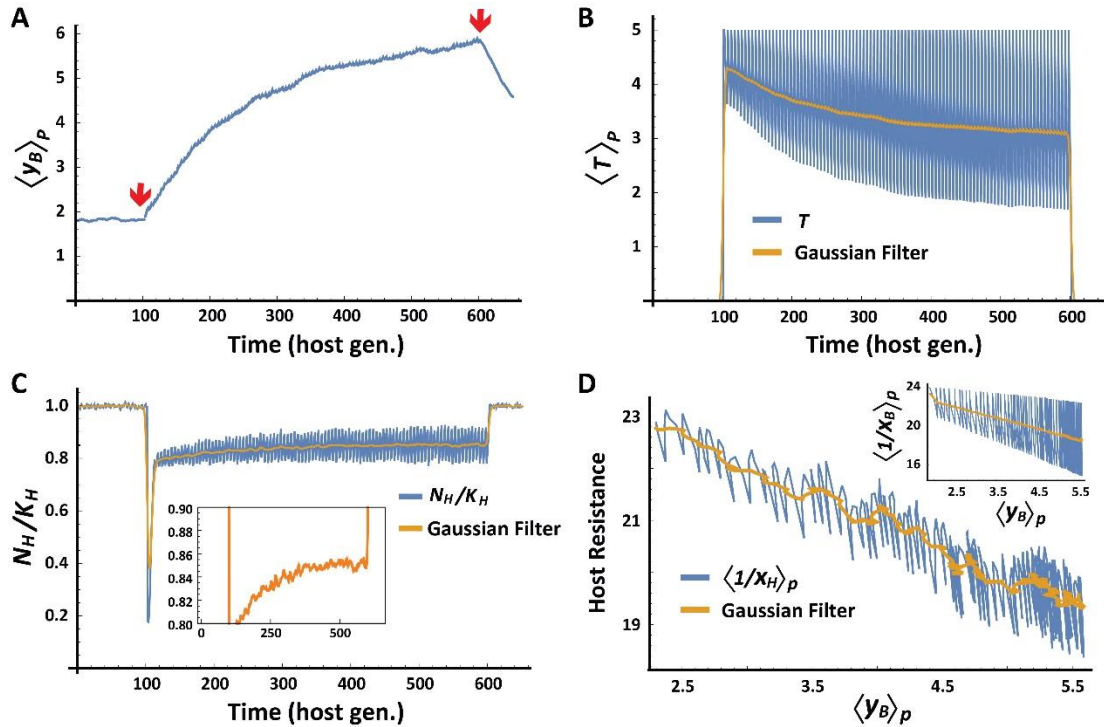

309

310 **Figure 4: Multi-generational coupling between microbiome properties and host-intrinsic traits.** The population  
 311 of host-microbiome systems was subjected to successive resetting of the active toxin to  $T = 5$ , every 5 host  
 312 generations. **(A-C)** Temporal kinetic profiles of average detox per bacteria (A), active toxin (B) and normalized size  
 313 of the host population (C), with a magnified scale in the inset. Red arrows in (A) mark the start and end of the  
 314 successive resetting of the toxin. **(D)** Inverse correlation between the increase in detox secretion per bacterium  
 315 and the average toxin resistance (inverse sensitivity) of host,  $1/x_H$ , and bacteria,  $1/x_B$  (inset). Orange overlays  
 316 correspond to Gaussian filtering of the measured properties.

317

### 318 Potential strategies for Lamarckian estimation in experimental settings

319 Quantification of the *Lamarckian* in the model was done by reverting a subset of host-microbiome  
 320 systems to their initial state and re-subjecting them to toxin. Since we cannot apply this procedure to  
 321 experimental data, the *Lamarckian* of a real system should be approximated by other means, which  
 322 may be context-dependent. In organisms such as flies and worms, where the bacteria can be removed  
 323 without a significant impact on survival (e.g. by egg dechoriation followed by placement on a  
 324 sufficiently rich diet [53-55]), the *Lamarckian* can be approximated in steps that are conceptually similar



325 to the simulation procedure: first, the hosts are exposed to a challenge and their offspring are cleared  
326 of bacteria and separated into two subpopulations. One of these subpopulations is re-colonized with  
327 ('naïve') microbiota from untreated hosts (as in refs. [34, 56]), while the other is colonized by  
328 ('experienced') microbiota from a group of hosts which survived exposure to a challenge. The  
329 *Lamarckian* is then evaluated using the survival rates of hosts with experienced vs. naïve microbiota (i.e.  
330  $L \approx SR_{Exp. \text{ microb.}} / SR_{Naïve \text{ microb.}} - 1$ ). This evaluation, however, neglects other types of changes that may  
331 have been acquired and transmitted to offspring (e.g. small RNAs [10], maternal RNA [57], persistent  
332 chromatin modifications [8], horizontal transfer of biochemical signals [58] or other modes of local niche  
333 construction [14], etc.). Additional consideration that may affect the evaluation is horizontal  
334 transmission of bacteria to bystander hosts and/or to offspring, which did not inherit the acquired  
335 change from their own parents. The above effects can be taken into account by removing the bacteria  
336 from two untreated subpopulations, re-colonizing them with 'naïve' and 'experienced' microbiota,  
337 respectively, and estimating the *Lamarckian* from the survival of these colonized populations under  
338 challenge. More generally, it should also be possible to obtain a relative measure of the *Lamarckian* by  
339 manipulating the microbiome (or any other factor) in a subpopulation of hosts and evaluating the  
340 relative difference in offspring adaptation compared to offspring of non-manipulated parents (taken  
341 from the same distribution of hosts).

342

## 343 Discussion

344 We explored the adaptation dynamics in a host-microbiome model in which Darwinian selection of the  
345 host is coupled to a faster selection of its vertically-transmitted bacteria. It is generally accepted that  
346 selection of bacteria occurs in every animal and plant and that some of these bacteria can be  
347 horizontally and/or vertically transmitted [25, 59, 60]. Transmission of a bacterial population that has  
348 acquired changes during a single host lifetime can potentially alter the state of the host and may confer



349 adaptive capabilities that are traditionally considered impossible for germ-free hosts and free-living  
350 bacteria. Rigorous evaluation of these capabilities has been hampered, however, by disagreement  
351 about how to conceptualize the adaptation and evolution of a composite system of host and bacteria  
352 [25, 36-38]. In particular, it is not clear whether the association of the bacterial community with a host  
353 (and its offspring) is tight enough to support their co-adaptation and evolution as a (holobiont) unit. Our  
354 model bypasses this difficulty by relying on well-accepted Darwinian selections operating, respectively,  
355 on hosts and (vertically transmitted) bacteria. We show that interaction between these selections can  
356 give rise to previously unrealized modes of emergent of adaptation, promoted by bacterial influence on  
357 the survival probability of the host. This includes a gain in offspring tolerance due to toxic exposure of  
358 the parental host (Lamarckian effect) and selection of hosts based on attributes of their bacterial  
359 communities (Microbiome selection). This was evidenced, for example, by the progressive increase in  
360 the host population size (Fig. 4D) despite a reduction in the intrinsic resistance of the host (Fig. 4C).

361 Within the simplified model in which the survival of the host is evaluated only at the time of  
362 reproduction, Lamarckian adaptation arises due to rapid selection and transmission of resistant  
363 bacteria. This transmission opposes the loss of bacteria following toxic exposure and confers two types  
364 of benefits to the host's offspring: a) reduction of physiological stress and b) increase in the total detox  
365 secreted by the bacteria. The contribution of each of these effects to Lamarckian-like adaptation  
366 depends on the level of toxic exposure and the detoxification capacity. Selection of hosts with higher  
367 bacterial detox, on the other hand, occurs on a timescale larger than one host generation and therefore  
368 cannot contribute to the *Lamarckian* which measures the offspring's gain in tolerance due to changes  
369 that occurred within a single generation of parent hosts. Microbiome selection is nonetheless the main  
370 contributor to the progressive increase in tolerance over multiple host generations. Taken together, the  
371 transient Lamarckian adaptation is mediated by selection of resistant bacteria within one host

372 generation while the longer-term adaptation under prolonged toxic pressure is achieved by selection of  
373 bacterial communities with higher detox per bacterium.

374 Although the aforementioned capabilities are linked to common features of host-microbiome systems,  
375 the scope and generality of the current model are limited by its simplifying assumptions. Studying the  
376 effects of factors that are not included in the present work (e.g. multiple species of symbionts and/or  
377 pathogens, epigenetic effects, etc.) requires suitable extensions of the model. A noteworthy aspect that  
378 is not covered in our model is the potential effect of horizontal transmission of bacteria. While the latter  
379 is generally expected to erode specific associations between host and bacteria [61], theoretical analysis  
380 of horizontal transfer under selection has demonstrated the feasibility of interspecific epistasis effects  
381 even in the absence of perfect transmission [62]. This possibility is further supported by evidence of  
382 high interpersonal variability in the composition of microbiota in different body habitats [63-65] as well  
383 as by dependence of the microbiome composition on genetic determinants of the host [65, 66] and  
384 host-specific factors [67, 68]. Based on the theoretical prediction and the experimental findings (as well  
385 as the insights from our simulations), we expect that the selection for higher bacterial detox will be  
386 weakened by horizontal transmission, but will vanish only in the limit of strong “mixing” in which all the  
387 hosts in a given generation are populated with indistinguishable bacterial communities. Emergent  
388 Lamarckian adaptation, on the other hand, should hold even in the extreme case of complete bacterial  
389 mixing, because it is mediated by rapid selection of resistant bacteria followed by transfer to the hosts  
390 in the following generation. Horizontal transfer is not expected to compromise these processes, but  
391 rather to promote sharing of the benefits with other offspring.

392 The large timescale separation between the selection of individual resistant bacteria and selection of  
393 bacterial communities which secrete more detox, reflects a lack of mechanism (in our model) for  
394 changing  $\langle y_B \rangle$  during a single host generation (with the possible exception of rare cases of rapid changes  
395 in  $\langle y_B \rangle$  due to amplification of very small numbers of resistant bacteria). This limitation can be removed

396 by allowing the stress of the host to influence the distributions of bacterial phenotypes. While we did  
397 not consider this type of influence in our simplified model, it likely applies to every host-microbiome  
398 system because of the numerous options for 2-way interactions between the host and its symbionts.  
399 An extension of the model which allows the stress of the host to influence the bacterial distribution of  
400 detox (e.g. by subjecting  $\beta_y$  to stress-dependent dynamics similar to that of  $K_B$ ) could increase the  
401 overall secretion of bacterial detox during the lifetime of the host. This could allow the host to benefit  
402 from newly-forming bacterial mutations and may further affect the *Lamarckian*.

403 Finally, we would like to re-emphasize that the proposed modelling framework does not aim to fit a  
404 particular host-microbiome system, but rather to investigate the possible modes of adaptation in a  
405 system with interactions between selections of host and vertically transmitted bacteria. We show that  
406 such interactions can support non-traditional adaptive modes, including a gain in tolerance of the host's  
407 offspring due to the toxic exposure of its parent and longer-term selection of hosts based on collective  
408 detox secretion by their bacterial communities. When the toxin persists, or is frequently re-  
409 encountered, the selection of detoxifying microbiomes reduces the toxic pressure on the host and  
410 weakens the selection of hosts based on their intrinsic resistance.

411

## 412 **Conclusions**

413 Our findings show that interactions between pure Darwinian selections of host and its bacteria can give  
414 rise to emergent adaptive capabilities, including Lamarckian-like adaptation of the host-microbiome  
415 system. Since the model considers general factors that are typical of host-microbiome systems, the  
416 emergent capabilities are likely relevant to most animals and plants and other types of organizations,  
417 which satisfy the general assumptions of this modelling framework. The latter can be readily adjusted  
418 to incorporate additional factors, such as having multiple species of symbionts and pathogens (with

419 inter-species competition and/or cooperation), asynchronous reproduction modes, epigenetic effects,  
420 ecological influences and transfer of bacteria (and/or toxin) between hosts and more.

421

## 422 **Methods**

423 **Simulation procedures:** The simulation starts with a population of hosts, each carrying a population  
424 of 100 bacteria. Host and bacterial properties (phenotypes) are initially drawn from defined  
425 distributions (steady state of Eq. 5 without toxin) with the parameters  $x_0 = 0.25$ ,  $\beta_x = 10$ ,  $y_0 = 0$ ,  $\beta_y =$   
426  $0.1$ ,  $\delta_0 = 0$  and  $\beta_\delta = 0.1$ .

427 In every time step of the simulation (one bacterial generation), each bacterium reproduces if its  
428 survival probability (Eq. 2) is larger than a random number (between 0 and 1) drawn from a uniform  
429 distribution. Each of the surviving bacteria (parents) persists at its current state and gives rise to a  
430 modified bacterium (offspring), while dead bacteria are discarded. At the end of one host generation  
431 (100 time steps), the reproduction of hosts is determined based on the survival probability in Eq. 1.  
432 Non-surviving hosts are discarded and each of the surviving hosts gives rise to a parent and offspring  
433 host as follows:

434 -The parent retains its current state ( $\mathbf{x}$ ,  $\mathbf{y}$ ,  $\delta$ ) and the state of its bacterial population.

435 -Following 99 bacterial generations, an offspring host is created with properties defined by Eq. 5.

436 Negative values of the sensitivity and detox are prevented by taking the absolute value of the

437 outcome in Eq.1. Each offspring receives a copy of the bacterial population of its parent. These

438 populations are then iterated forward one bacterial generation, the surviving bacteria reproduce so

439 as to define the initial state of the bacterial populations in the next host generation of the parent and

440 its offspring.

441

## 442 Acknowledgements

443 We would like to thank Prof. Naama Brenner (Technion, Israel), Prof. Michael Shapira (UC Berkeley). Dr.  
444 Michael Elgart (Weizmann Inst. Israel), Maor Knafo (Weizmann Inst. Israel), Prof. Erez Braun (Technion,  
445 Israel) and Prof. David Bensimon (Paris ENS-LPS, France) for helpful discussions and suggestions.  
446 YS was supported by the John Templeton Foundation grant No. 40663. YR was supported by the Israel  
447 Science Foundation grant 1902/12 and the I-CORE Program of the Planning and Budgeting Committee  
448 of the Israel Council for Higher Education. DK was supported by the Binational Science Foundation, grant  
449 2015619.

450

## 451 References

452

- 453 1. Koonin EV, Wolf YI: **Is evolution Darwinian or/and Lamarckian?** *Biology direct* 2009, **4**:42.
- 454 2. Noble D, Jablonka E, Joyner MJ, Muller GB, Omholt SW: **Evolution evolves: physiology**  
455 **returns to centre stage.** *The Journal of physiology* 2014, **592**.
- 456 3. Rosenberg E, Sharon G, Zilber-Rosenberg I: **The hologenome theory of evolution contains**  
457 **Lamarckian aspects within a Darwinian framework.** *Environmental microbiology* 2009,  
458 **11**.
- 459 4. Laland K, Uller T, Feldman M, Sterelny K, Muller BG, Moczek A, Jablonka E, Odling-Smee  
460 J, Wray GA, Hoekstra HE *et al*: **Does evolutionary theory need a rethink?** In: *Nature*. 2014.
- 461 5. Soen Y: **Environmental disruption of host-microbe co-adaptation as a potential driving**  
462 **force in evolution.** *Frontiers in genetics* 2014, **5**.
- 463 6. Soen Y, Knafo M, Elgart M: **A principle of organization which facilitates broad**  
464 **Lamarckian-like adaptations by improvisation.** *Biology direct* 2015, **10**(1):1-17.
- 465 7. Braun E: **The unforeseen challenge: from genotype-to-phenotype in cell populations.**  
466 *Rep Prog Phys* 2015, **78**.
- 467 8. Seong K-H, Li D, Shimizu H, Nakamura R, Ishii S: **Inheritance of stress-induced, ATF-2-**  
468 **dependent epigenetic change.** *Cell* 2011, **145**(7):1049-1061.
- 469 9. Stern S, Fridmann-Sirkis Y, Braun E, Soen Y: **Epigenetically heritable alteration of fly**  
470 **development in response to toxic challenge.** *Cell Rep* 2012, **1**.
- 471 10. Rechavi O, Minevich G, Hobert O: **Transgenerational inheritance of an acquired small**  
472 **RNA-based antiviral response in C. elegans.** *Cell* 2011, **147**.
- 473 11. Jablonka E, Raz G: **Transgenerational epigenetic inheritance: prevalence, mechanisms,**  
474 **and implications for the study of heredity and evolution.** *The Quarterly review of biology*  
475 2009, **84**.

- 476 12. Koonin EV: **Viruses and mobile elements as drivers of evolutionary transitions.**  
477 *Philosophical transactions of the Royal Society of London Series B, Biological sciences*  
478 2016, **371**(1701).
- 479 13. Koonin EV, Wolf YI: **Just how Lamarckian is CRISPR-Cas immunity: the continuum of**  
480 **evolvability mechanisms.** *Biology direct* 2016, **11**(1):9.
- 481 14. Odling-Smee J: **Niche Inheritance: A Possible Basis for Classifying Multiple Inheritance**  
482 **Systems in Evolution.** *Biological Theory* 2007, **2**:276–289.
- 483 15. Zilber-Rosenberg I, Rosenberg E: **Role of microorganisms in the evolution of animals and**  
484 **plants: the hologenome theory of evolution.** *FEMS microbiology reviews* 2008, **32**.
- 485 16. Gilbert SF, Sapp J, Tauber AI: **A symbiotic view of life: We have never been individuals.**  
486 *The Quarterly review of biology* 2012, **87**.
- 487 17. Margulis L (ed.): **Symbiosis as a source of evolutionary innovation: speciation and**  
488 **morphogenesis:** Cambridge: MIT press; 1991.
- 489 18. Dittmer J, van Opstal EJ, Shropshire JD, Bordenstein SR, Hurst GD, Brucker RM:  
490 **Disentangling a Holobiont - Recent Advances and Perspectives in Nasonia Wasps.** *Front*  
491 *Microbiol* 2016, **7**:1478.
- 492 19. Frydman HM, Li JM, Robson DN, Wieschaus E: **Somatic stem cell niche tropism in**  
493 **Wolbachia.** *Nature* 2006, **441**(7092):509-512.
- 494 20. Brooks AW, Kohl KD, Brucker RM, van Opstal EJ, Bordenstein SR: **Phylosymbiosis:**  
495 **Relationships and Functional Effects of Microbial Communities across Host Evolutionary**  
496 **History.** *PLoS biology* 2016, **14**(11):e2000225.
- 497 21. Remigi P, Capela D, Clerissi C, Tasse L, Torchet R, Bouchez O, Batut J, Cruveiller S, Rocha  
498 EP, Masson-Boivin C: **Transient hypermutagenesis accelerates the evolution of legume**  
499 **endosymbionts following horizontal gene transfer.** *PLoS biology* 2014, **12**(9):e1001942.
- 500 22. Kopac SM, Klassen JL: **Can They Make It on Their Own? Hosts, Microbes, and the**  
501 **Holobiont Niche.** *Frontiers in Microbiology* 2016, **7**.
- 502 23. Bruno JF, Stachowicz JJ, Bertness MD: **Inclusion of facilitation into ecological theory.**  
503 *Trends Ecol Evol* 2003, **18**(3):119-125.
- 504 24. Lewin-Epstein O, Aharonov R, Hadany L: **Microbes can help explain the evolution of host**  
505 **altruism.** *Nat Commun* 2017, **8**:14040.
- 506 25. Bordenstein SR, Theis KR: **Host Biology in Light of the Microbiome: Ten Principles of**  
507 **Holobionts and Hologenomes.** *PLoS biology* 2015, **13**(8):e1002226.
- 508 26. Macke E, Tasiemski A, Massol F, Callens M, Decaestecker E: **Life history and eco-**  
509 **evolutionary dynamics in light of the gut microbiota.** *Oikos* 2017, **126**(4):508-531.
- 510 27. Vavre F, Kremer N: **Microbial impacts on insect evolutionary diversification: from**  
511 **patterns to mechanisms.** *Curr Opin Insect Sci* 2014, **4**:29-34.
- 512 28. McFall-Ngai M, Hadfield MG, Bosch TC, Carey HV, Domazet-Loso T, Douglas AE, Dubilier  
513 N, Eberl G, Fukami T, Gilbert SF *et al*: **Animals in a bacterial world, a new imperative for**  
514 **the life sciences.** *Proceedings of the National Academy of Sciences of the United States of*  
515 *America* 2013, **110**(9):3229-3236.
- 516 29. McFall-Ngai MJ: **Unseen forces: the influence of bacteria on animal development.**  
517 *Developmental biology* 2002, **242**(1):1-14.
- 518 30. Peiffer JA, Spor A, Koren O, Jin Z, Tringe SG, Dangl JL, Buckler ES, Ley RE: **Diversity and**  
519 **heritability of the maize rhizosphere microbiome under field conditions.** *Proceedings of*  
520 *the National Academy of Sciences of the United States of America* 2013, **110**(16):6548-  
521 6553.

- 522 31. Goodrich JK, Davenport ER, Beaumont M, Jackson MA, Knight R, Ober C, Spector TD, Bell  
523 JT, Clark AG, Ley RE: **Genetic Determinants of the Gut Microbiome in UK Twins.** *Cell host*  
524 *& microbe* 2016, **19**(5):731-743.
- 525 32. Remigi P, Zhu J, Young JPW, Masson-Boivin C: **Symbiosis within Symbiosis: Evolving**  
526 **Nitrogen-Fixing Legume Symbionts.** *Trends in microbiology* 2016, **24**(1):63-75.
- 527 33. Beaumont M, Goodrich JK, Jackson MA, Yet I, Davenport ER, Vieira-Silva S, Debelius J,  
528 Pallister T, Mangino M, Raes J *et al*: **Heritable components of the human fecal**  
529 **microbiome are associated with visceral fat.** *Genome biology* 2016, **17**(1):189.
- 530 34. Fridmann-Sirkis Y, Stern S, Elgart M, Galili M, Zeisel A, Shental N, Soen Y: **Delayed**  
531 **development induced by toxicity to the host can be inherited by a bacterial-dependent,**  
532 **transgenerational effect.** *Frontiers in genetics* 2014, **5**:27.
- 533 35. Rosenberg E, Koren O, Reshef L, Efrony R, Zilber-Rosenberg I: **The role of microorganisms**  
534 **in coral health, disease and evolution.** *Nature reviews Microbiology* 2007, **5**(5):355-362.
- 535 36. Douglas AE, Werren JH: **Holes in the Hologenome: Why Host-Microbe Symbioses Are**  
536 **Not Holobionts.** *MBio* 2016, **7**(2):e02099.
- 537 37. Moran NA, Sloan DB: **The Hologenome Concept: Helpful or Hollow?** *PLoS biology* 2015,  
538 **13**(12):e1002311.
- 539 38. Theis KR, Dheilly NM, Klassen JL, Brucker RM, Baines JF, Bosch TC, Cryan JF, Gilbert SF,  
540 Goodnight CJ, Lloyd EA *et al*: **Getting the Hologenome Concept Right: an Eco-**  
541 **Evolutionary Framework for Hosts and Their Microbiomes.** *mSystems* 2016, **1**(2).
- 542 39. Roughgarden J, Gilbert SF, Rosenberg E, Zilber-Rosenberg I, Lloyd EA: **Holobionts as Units**  
543 **of Selection and a Model of Their Population Dynamics and Evolution.** *Biological Theory*  
544 2018, **13**(1):44-65.
- 545 40. Castillo-Chavez FBaC: **Mathematical Models in Population Biology and Epidemiology.**  
546 New York: Springer-Verlag; 2000.
- 547 41. Crow JF, Kimura M: **An introduction to population genetics theory.** New York,: Harper &  
548 Row; 1970.
- 549 42. Douglas AE: **The microbial dimension in insect nutritional ecology.** *Funct Ecol* 2009,  
550 **23**(1):38-47.
- 551 43. Sekirov I, Russell SL, Antunes LC, Finlay BB: **Gut microbiota in health and disease.** *Physiol*  
552 *Rev* 2010, **90**(3):859-904.
- 553 44. Lee WJ, Brey PT: **How Microbiomes Influence Metazoan Development: Insights from**  
554 **History and Drosophila Modeling of Gut-Microbe Interactions.** *Annu Rev Cell Dev Bi*  
555 2013, **29**:571-592.
- 556 45. Mouton L, Henri H, Charif D, Bouletreau M, Vavre F: **Interaction between host genotype**  
557 **and environmental conditions affects bacterial density in Wolbachia symbiosis.** *Biol Lett*  
558 2007, **3**(2):210-213.
- 559 46. Muscatine L, Pool RR: **Regulation of numbers of intracellular algae.** *Proc R Soc Lond B Biol*  
560 *Sci* 1979, **204**(1155):131-139.
- 561 47. Fishman Y, Zlotkin E, Sher D: **Expulsion of symbiotic algae during feeding by the green**  
562 **hydra--a mechanism for regulating symbiont density?** *PloS one* 2008, **3**(7):e2603.
- 563 48. Siciliano SD, Fortin N, Mihoc A, Wisse G, Labelle S, Beaumier D, Ouellette D, Roy R, Whyte  
564 LG, Banks MK *et al*: **Selection of specific endophytic bacterial genotypes by plants in**  
565 **response to soil contamination.** *Applied and environmental microbiology* 2001,  
566 **67**(6):2469-2475.
- 567 49. Ceja-Navarro JA, Vega FE, Karaoz U, Hao Z, Jenkins S, Lim HC, Kosina P, Infante F, Northen  
568 TR, Brodie EL: **Gut microbiota mediate caffeine detoxification in the primary insect pest**  
569 **of coffee.** *Nature communications* 2015, **6**:7618.



- 570 50. Tetard-Jones C, Edwards R: **Potential roles for microbial endophytes in herbicide**  
571 **tolerance in plants.** *Pest Manag Sci* 2016, **72**(2):203-209.
- 572 51. Waddington CH: **GENETIC ASSIMILATION OF THE BITHORAX PHENOTYPE.** *Evolution*  
573 1956, **10**:1-13.
- 574 52. Gibson G, Hogness DS: **Effect of polymorphism in the Drosophila regulatory gene**  
575 **Ultrabithorax on homeotic stability.** *Science* 1996, **271**(5246):200-203.
- 576 53. Ridley EV, Wong AC, Douglas AE: **Microbe-dependent and nonspecific effects of**  
577 **procedures to eliminate the resident microbiota from Drosophila melanogaster.** *Applied*  
578 *and environmental microbiology* 2013, **79**(10):3209-3214.
- 579 54. Brummel T, Ching A, Seroude L, Simon AF, Benzer S: **Drosophila lifespan enhancement**  
580 **by exogenous bacteria.** *Proceedings of the National Academy of Sciences of the United*  
581 *States of America* 2004, **101**(35):12974-12979.
- 582 55. Berg M, Stenuit B, Wang A, Ho JA, Alvarez-Cohen L, Shapira M: **Assembly of the**  
583 **Caenorhabditis elegans Gut Microbiota from Diverse Soil Microbial Environments.** *ISME*  
584 *J, Accepted* 2016.
- 585 56. Elgart M, Stern S, Salton O, Gnainsky Y, Heifetz Y, Soen Y: **Impact of gut microbiota on the**  
586 **fly's germ line.** *Nature communications* 2016, **7**:11280.
- 587 57. Stern S, Snir O, Mizrahi E, Galili M, Zaltsman I, Soen Y: **Reduction in maternal polycomb**  
588 **levels contributes to transgenerational inheritance of a response to toxic stress in flies.**  
589 *The Journal of physiology* 2014, **592**(Pt 11):2343-2355.
- 590 58. Miller GA, Islam MS, Claridge TD, Dodgson T, Simpson SJ: **Swarm formation in the desert**  
591 **locust Schistocerca gregaria: isolation and NMR analysis of the primary maternal**  
592 **gregarizing agent.** *J Exp Biol* 2008, **211**(Pt 3):370-376.
- 593 59. Werren JH: **Biology of Wolbachia.** *Annu Rev Entomol* 1997, **42**:587-609.
- 594 60. Bright M, Bulgheresi S: **A complex journey: transmission of microbial symbionts.** *Nature*  
595 *reviews Microbiology* 2010, **8**(3):218-230.
- 596 61. Brandvain Y, Goodnight C, Wade MJ: **Horizontal transmission rapidly erodes disequilibria**  
597 **between organelle and symbiont genomes.** *Genetics* 2011, **189**(1):397-404.
- 598 62. Fitzpatrick BM: **Symbiote transmission and maintenance of extra-genomic associations.**  
599 *Front Microbiol* 2014, **5**:46.
- 600 63. Asnicar F, Manara S, Zolfo M, Truong DT, Scholz M, Armanini F, Ferretti P, Gorfer V,  
601 Pedrotti A, Tett A *et al*: **Studying Vertical Microbiome Transmission from Mothers to**  
602 **Infants by Strain-Level Metagenomic Profiling.** *mSystems* 2017, **2**(1).
- 603 64. Costello EK, Lauber CL, Hamady M, Fierer N, Gordon JI, Knight R: **Bacterial community**  
604 **variation in human body habitats across space and time.** *Science* 2009, **326**(5960):1694-  
605 1697.
- 606 65. Blekhman R, Goodrich JK, Huang K, Sun Q, Bukowski R, Bell JT, Spector TD, Keinan A, Ley  
607 RE, Gevers D *et al*: **Host genetic variation impacts microbiome composition across**  
608 **human body sites.** *Genome biology* 2015, **16**:191.
- 609 66. Goodrich JK, Waters JL, Poole AC, Sutter JL, Koren O, Blekhman R, Beaumont M, Van  
610 Treuren W, Knight R, Bell JT *et al*: **Human genetics shape the gut microbiome.** *Cell* 2014,  
611 **159**(4):789-799.
- 612 67. Dicksved J, Halfvarson J, Rosenquist M, Jarnerot G, Tysk C, Apajalahti J, Engstrand L,  
613 Jansson JK: **Molecular analysis of the gut microbiota of identical twins with Crohn's**  
614 **disease.** *ISME J* 2008, **2**(7):716-727.
- 615 68. Young VB, Schmidt TM: **Antibiotic-associated diarrhea accompanied by large-scale**  
616 **alterations in the composition of the fecal microbiota.** *J Clin Microbiol* 2004, **42**(3):1203-  
617 1206.



618
